# Supplementary material for: Sex Differences under Vitamin D Supplementation in an Animal Model of Progressive Multiple Sclerosis
Source: MDPI journal article supplement (doi:10.3390/nu16040554), 2024-02-17
Supplement: s1 [file s1]

**Supplementary Table S1** A detailed list of all used important abbreviations.

|                       |                |                                                                                                         |
|-----------------------|----------------|---------------------------------------------------------------------------------------------------------|
| <b>Group names</b>    | <b>FHAC</b>    | Female healthy appearing control                                                                        |
|                       | <b>FMOG</b>    | Female myelin oligodendrocyte glycoprotein immunized rats                                               |
|                       | <b>Fd1</b>     | Female rats, day 1 after cytokine injection                                                             |
|                       | <b>Fd1VD</b>   | Female rats, day 1 after cytokine injection, vitamin D supplemented                                     |
|                       | <b>Fd3</b>     | Female rats, day 3 after cytokine injection                                                             |
|                       | <b>Fd3VD</b>   | Female rats, day 3 after cytokine injection, vitamin D supplemented                                     |
|                       | <b>Fd15</b>    | Female rats, day 15 after cytokine injection                                                            |
|                       | <b>Fd15VD</b>  | Female rats, day 15 after cytokine injection, vitamin D supplemented                                    |
|                       | <b>Fd30</b>    | Female rats, day 30 after cytokine injection                                                            |
|                       | <b>Fd30VD</b>  | Female rats, day 30 after cytokine injection, vitamin D supplemented                                    |
|                       | <b>Fd45*</b>   | Female rats, day 45 after two cytokine injections (one on day 0, one on day 30)                         |
|                       | <b>Fd45*VD</b> | Female rats, day 45 after two cytokine injections (one on day 0, one on day 30), vitamin D supplemented |
|                       | <b>MHAC</b>    | Male healthy appearing control                                                                          |
|                       | <b>MMOG</b>    | Male myelin oligodendrocyte glycoprotein immunized rats                                                 |
|                       | <b>Md1</b>     | Male rats, day 1 after cytokine injection                                                               |
|                       | <b>Md1VD</b>   | Male rats, day 1 after cytokine injection, vitamin D supplemented                                       |
|                       | <b>Md3</b>     | Male rats, day 3 after cytokine injection                                                               |
|                       | <b>Md3VD</b>   | Male rats, day 3 after cytokine injection, vitamin D supplemented                                       |
|                       | <b>Md15</b>    | Male rats, day 15 after cytokine injection                                                              |
|                       | <b>Md15VD</b>  | Male rats, day 15 after cytokine injection, vitamin D supplemented                                      |
|                       | <b>Md30</b>    | Male rats, day 30 after cytokine injection                                                              |
|                       | <b>Md30VD</b>  | Male rats, day 30 after cytokine injection, vitamin D supplemented                                      |
|                       | <b>Md45*</b>   | Male rats, day 45 after two cytokine injections (one on day 0, one on day 30)                           |
|                       | <b>Md45*VD</b> | Male rats, day 45 after two cytokine injections (one on day 0, one on day 30), vitamin D supplemented   |
| <b>Tissue markers</b> | <b>PLP</b>     | Proteolipid protein, myelin protein marker                                                              |
|                       | <b>Iba1</b>    | Ionized calcium-binding adaptor molecule 1, marker for activated microglia                              |

|                      |                             |                                                                        |
|----------------------|-----------------------------|------------------------------------------------------------------------|
|                      | <b>Casp3</b>                | Caspase 3, marker for apoptotic cells                                  |
|                      | <b>NeuN</b>                 | Neuronal-Nuclei, marker to detect most postmitotic neuronal cell types |
|                      | <b>Cu<sup>++</sup>oxLDL</b> | Cu <sup>++</sup> oxidized low-density lipoprotein                      |
|                      | <b>HOClo<sub>x</sub>LDL</b> | Hypochlorous acid oxidized low-density lipoprotein                     |
| <b>Serum markers</b> | <b>TAC</b>                  | Total anti-oxidative capacity                                          |
|                      | <b>PP</b>                   | Polyphenols                                                            |
|                      | <b>sNfL</b>                 | Serum neurofilament light chain                                        |

**Supplementary Table S2** Primary and secondary antibodies used during this study with detailed information.

| <b>Antibody</b>        | <b>Target</b>                                       | <b>Host</b> | <b>Dilution</b> | <b>Marker/<br/>Purpose</b> | <b>Company<br/>and<br/>Catalog<br/>number</b> | <b>AB ID</b>   |
|------------------------|-----------------------------------------------------|-------------|-----------------|----------------------------|-----------------------------------------------|----------------|
| Caspase3               | Anti-active Caspase3 antibody                       | rabbit      | 1:500           | Apoptosis                  | Abcam<br>ab2302                               | AB_30296<br>2  |
| Cu <sup>++</sup> oxLDL | Anti-lipoprotein (a), oxidized via Cu <sup>++</sup> | sheep       | 1:3000          | Oxidative Stress           | FT-OL11                                       |                |
| GFAP                   | anti-GFAP Ab-6 (Clone ASTRO6)                       | mouse       | 1:100           | Activated Astrocytes       | Thermo Scientific<br>MS-1376                  | AB_10959<br>84 |
| HOClo <sub>x</sub> LDL | Anti-modified LDL (via HOCl)                        | rabbit      | 1:2000          | Oxidative Stress           | HL02                                          |                |
| Iba1                   | Anti Ionized calcium-binding adaptor molecule 1     | rabbit      | 1:1000          | Mikroglia                  | Wako<br>019-19741                             | AB_83950<br>4  |
| NeuN                   | Anti-Neuronal-Nuclei, clone A60 (KC)                | mouse       | 1:100           | Neurons                    | Millipore<br>MAB377-KC                        | AB_22987<br>72 |
| NfH                    | Anti-200kD Neurofilament Heavy Chain antibody       | rabbit      | 1:2000          | Neuro-filament             | Abcam<br>ab8135                               | AB_30629<br>8  |
| PLP                    | Anti-myelin                                         | mouse       | 1:500           | De-                        | AbD                                           | AB_22371       |

|                                    |                     |       |                 |                       |                        |                |
|------------------------------------|---------------------|-------|-----------------|-----------------------|------------------------|----------------|
|                                    | proteolipid protein |       |                 | myelination           | Serotec<br>MCA839<br>G | 98             |
| anti-rabbit<br>ImmPRESS<br>reagent | anti-rabbit IgG     | horse | ready to<br>use | Secondary<br>antibody | Vector<br>MP-7401      | AB_23365<br>29 |
| anti-mouse<br>ImmPRESS<br>reagent  | anti-mouse IgG      | horse | ready to<br>use | Secondary<br>antibody | Vector<br>MP-7422      | AB_23365<br>27 |

**Supplementary Table S3** sNfL results of female VD<sup>-</sup> rats.

|                        | FHAC                | Fd15                | Fd30                | Fd45*               |
|------------------------|---------------------|---------------------|---------------------|---------------------|
| N =                    | 5                   | 7                   | 4                   | 5                   |
| Median                 | 5.11                | 5.90                | 9.10                | 37.00               |
| Interquartile<br>range | 1.83                | 4.15                | 14.03               | 46.65               |
| VS Fd15 p =            | 0.295               | x                   | 0.086               | <b><u>0.009</u></b> |
| VS Fd30 p =            | <b><u>0.027</u></b> | 0.086               | x                   | <b><u>0.027</u></b> |
| VS Fd45* p=            | <b><u>0.009</u></b> | <b><u>0.009</u></b> | <b><u>0.027</u></b> | x                   |
